# Supplementary material for: Zeolite Composite Materials from Fly Ash: An Assessment of Physicochemical and Adsorption Properties
Source: MDPI journal article supplement (doi:10.3390/ma16062142), 2023-03-07
Supplement: s1 [file s1]

## SUPPLEMENTARY MATERIALS

### **Zeolite Composite Materials from Fly Ash: An Assessment of Physicochemical and Adsorption Properties**

Jakub Mokrzycki<sup>1\*</sup>, Wojciech Franus<sup>2</sup>, Rafał Panek<sup>2</sup>, Maciej Sobczyk<sup>3</sup>, Piotr Rusiniak<sup>4</sup>, Justyna Szerement<sup>5</sup>, Renata Jarosz<sup>3</sup>, Lidia Marcińska-Mazur<sup>3</sup>, Tomasz Bajda<sup>3</sup>, Monika Mierzwa-Hersztek<sup>3,6</sup>

**\*Corresponding author:** Jakub Mokrzycki, *[jmokrzycki@agh.edu.pl](mailto:jmokrzycki@agh.edu.pl)*

**Table S1.** Chemical composition of CFA, HCFA, and vermiculite as obtained from XRF.

| Component<br><i>wt. %</i> | Sample |      |             |
|---------------------------|--------|------|-------------|
|                           | CFA    | HCFA | vermiculite |
| Si                        | 51.6   | 30.0 | 42.0        |
| Ti                        | 1.8    | 1.0  | 0.9         |
| Al                        | 25.8   | 13.5 | 7.8         |
| Fe                        | 7.2    | 8.6  | 13.1        |
| Ca                        | 3.0    | 3.7  | 1.4         |
| Mg                        | 0.9    | 1.5  | 23.0        |
| K                         | 3.0    | 2.3  | 0.8         |
| S                         | 0.6    | 1.2  | -           |
| C                         | -      | 30.0 | -           |

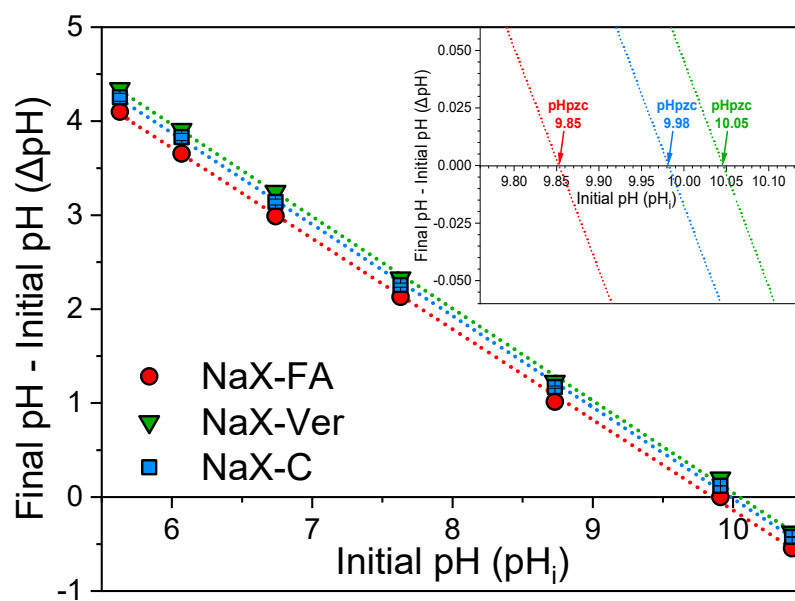

**Figure S1.** Determination of the pH point of zero charge of investigated zeolites.

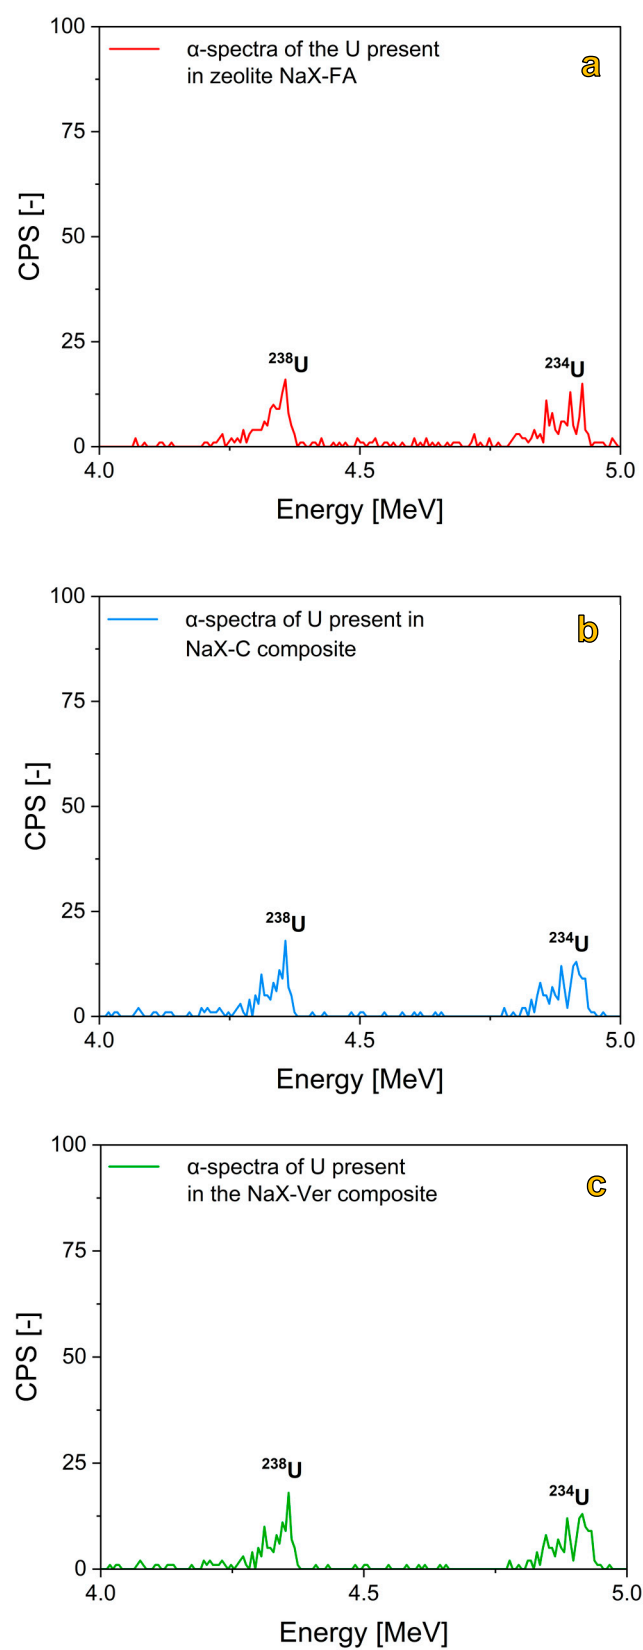

**Figure S2.** A spectra of U in the zeolites samples: NaX-FA (a), NaX-C (b), and NaX-Ver (c).
